# Supplementary material for: Formation, reactivity and redox properties of carbon- and sulfur-bridged diiron complexes derived from dibenzothienyl Schiff bases: effect of N,N- and N,P-chelating moieties
Source: Royal Society of Chemistry journal article supplement (doi:10.1039/c4dt03422h), 2015-01-01
Supplement: c4dt03422h1.pdf [file c4dt03422h1.pdf]

## Supplementary Information

**Formation, reactivity and redox properties of carbon- and sulfur-bridged diiron complexes derived from dibenzothienyl Schiff bases: effect of N,N- and N,P-chelating moieties**

**Kiyokazu Santo, Masakazu Hirotsu,\* and Isamu Kinoshita**

*Division of Molecular Materials Science, Graduate School of Science, Osaka City University, Sumiyoshi-ku, Osaka 558-8585, Japan. Fax: 816 6605 2522; Tel: 816 6605 2519; E-mail: mhiro@sci.osaka-cu.ac.jp*

In all of the following NMR spectra, residual solvent signals are marked with an asterisk.

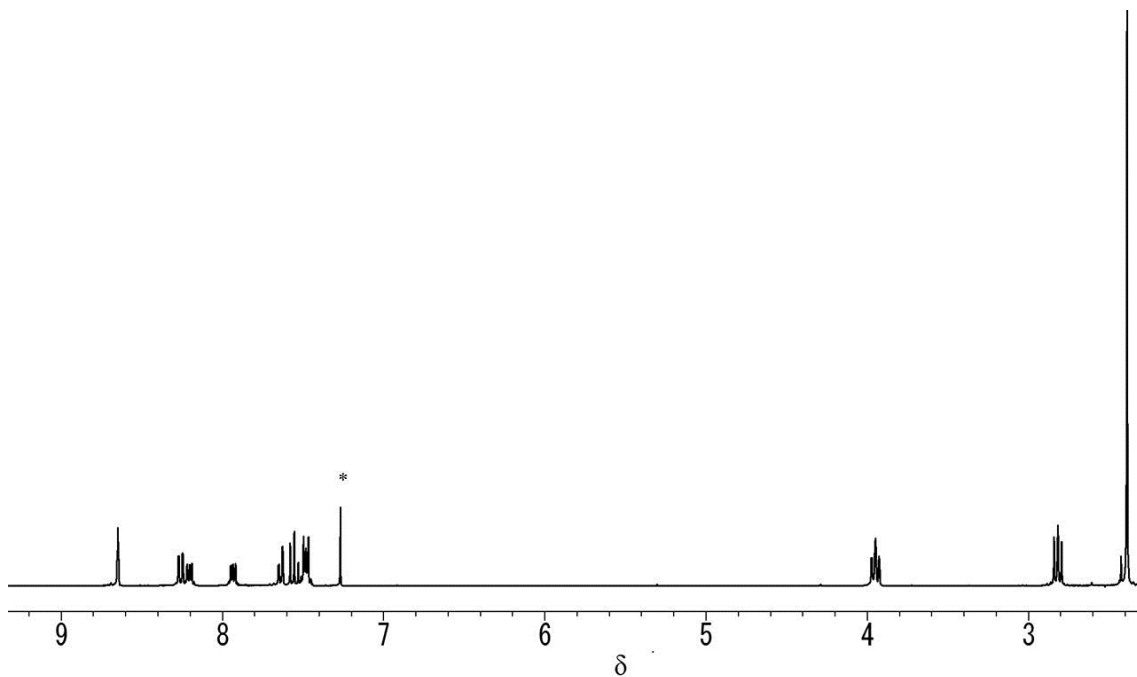

**Figure S1.**  $^1\text{H}$  NMR spectrum (300 MHz) of DBT-NN in  $\text{CDCl}_3$ .

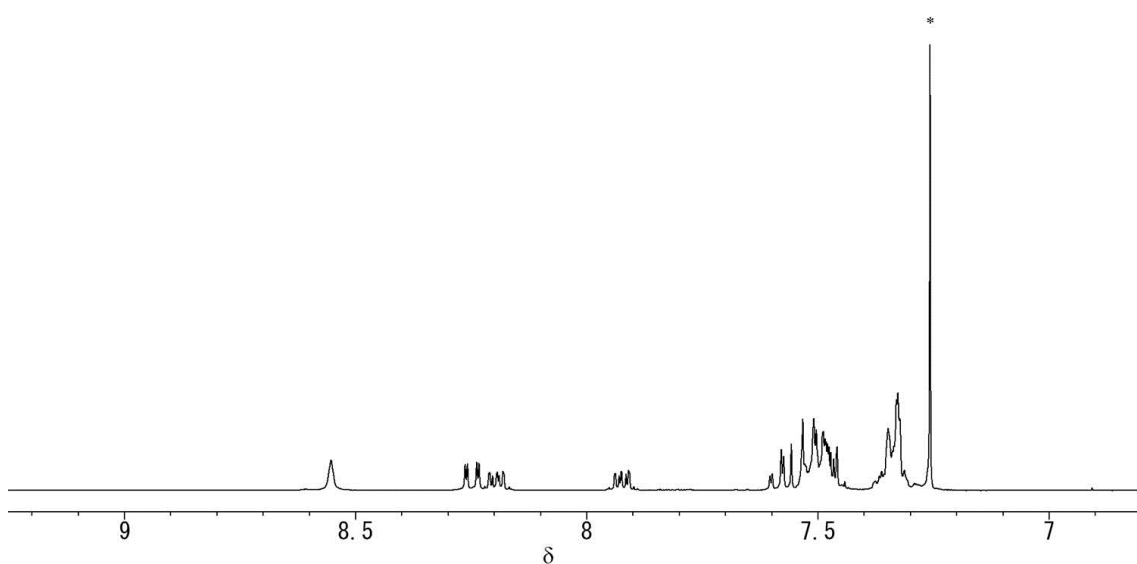

**Figure S2.**  $^1\text{H}$  NMR spectrum (300 MHz) of DBT-NP in  $\text{CDCl}_3$ .

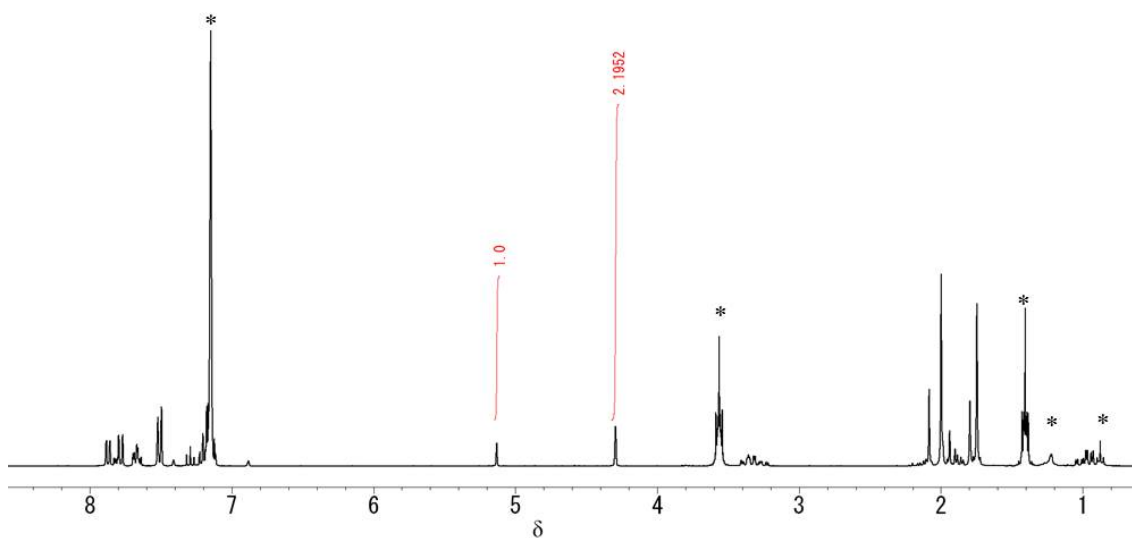

**Figure S3.**  $^1\text{H}$  NMR spectrum (300 MHz) of **1** in  $\text{C}_6\text{D}_6$ .

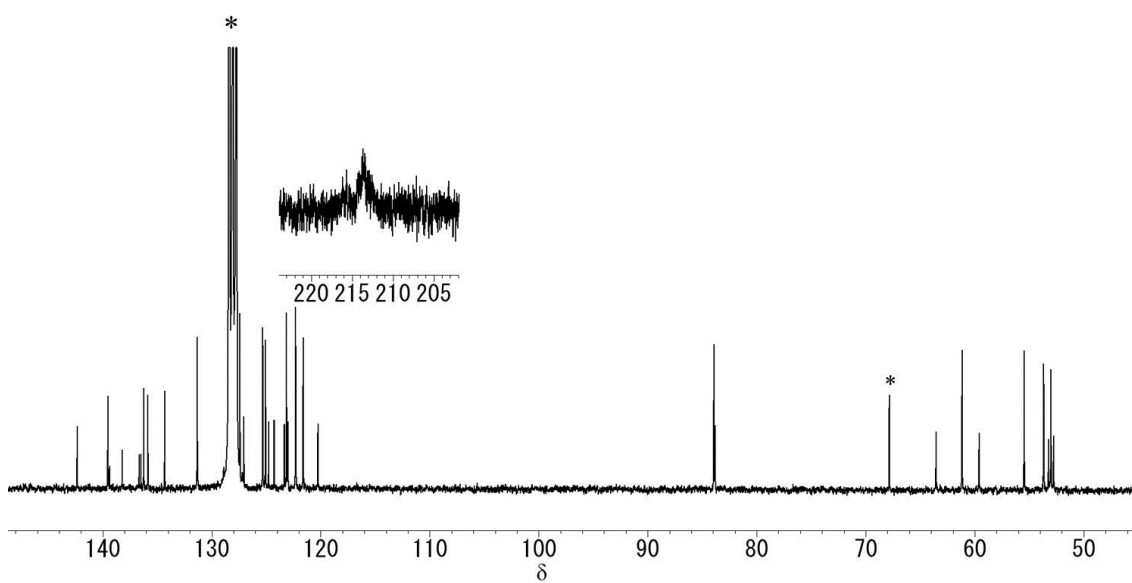

**Figure S4.**  $^{13}\text{C}\{^1\text{H}\}$  NMR spectrum (75.5 MHz) of **1** in  $\text{C}_6\text{D}_6$ . Residual solvent signals are marked with an asterisk.

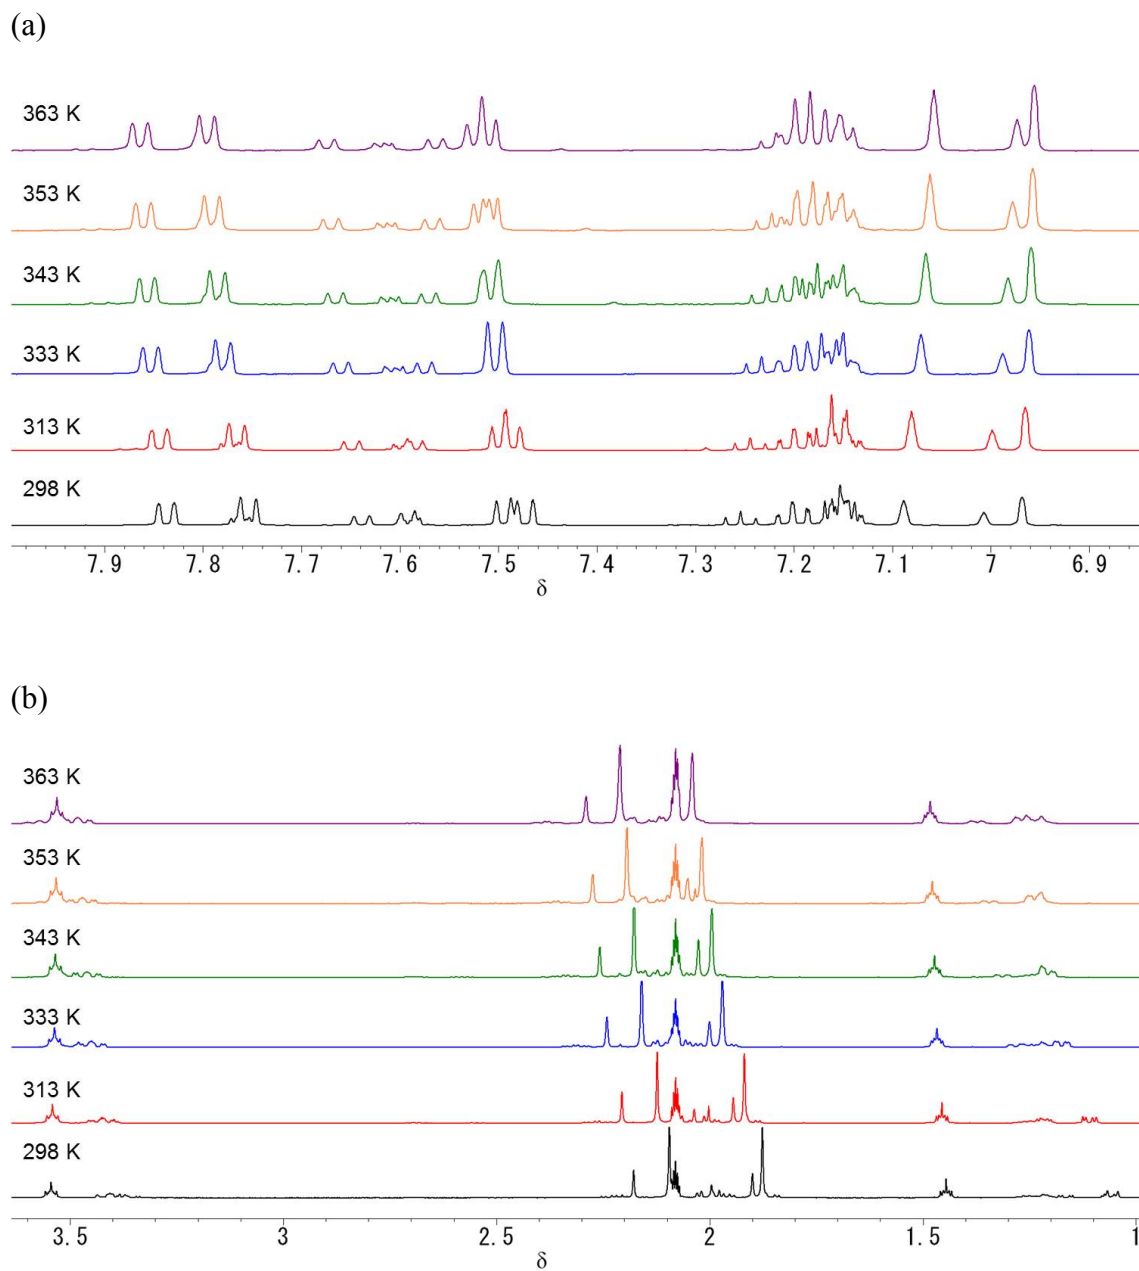

**Figure S5.** Variable temperature  $^1\text{H}$  NMR spectra (500 MHz) of **1** in toluene- $d^8$  (298—363 K).

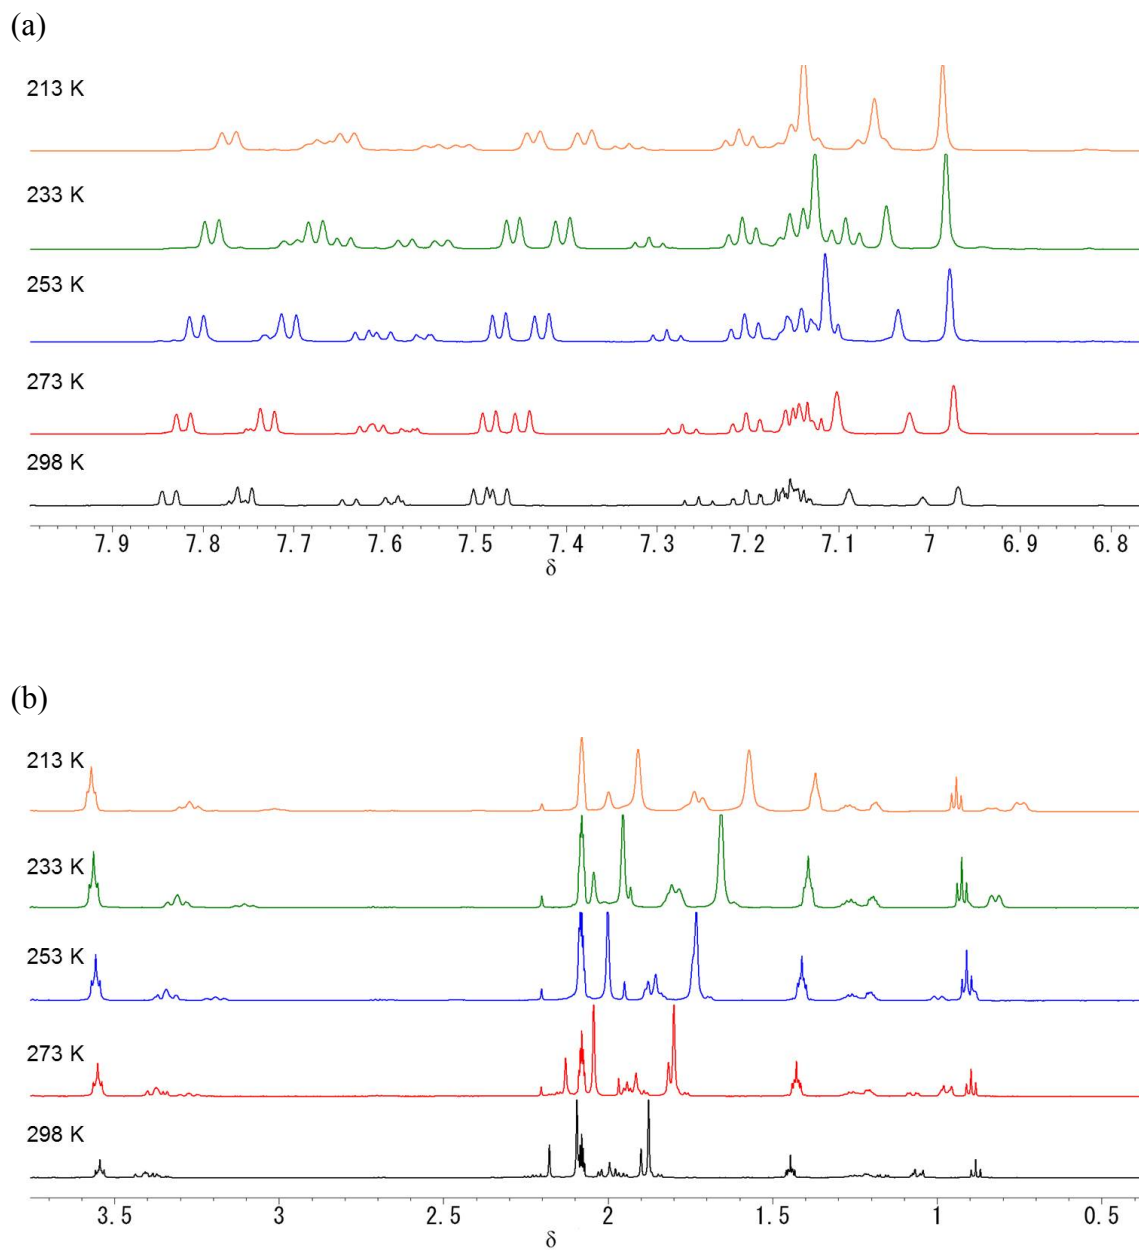

**Figure S6.** Variable temperature  $^1\text{H}$  NMR spectra (500 MHz) of **1** in toluene- $d^8$  (213—298 K).

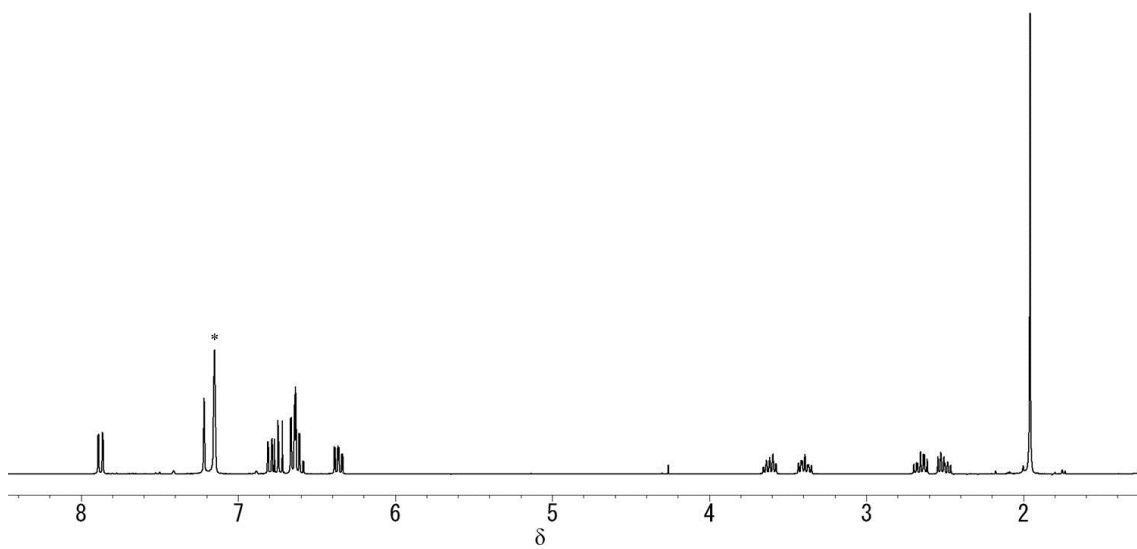

**Figure S7.**  $^1\text{H}$  NMR spectrum (300 MHz) of **2** in  $\text{C}_6\text{D}_6$ .

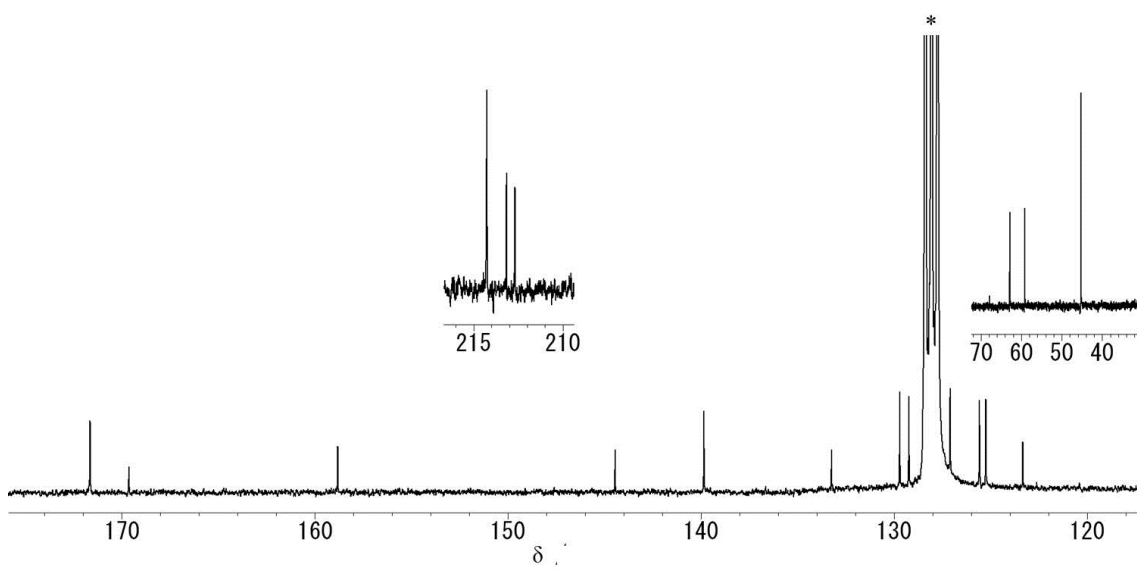

**Figure S8.**  $^{13}\text{C}\{^1\text{H}\}$  NMR spectrum (75.5 MHz) of **2** in  $\text{C}_6\text{D}_6$ .

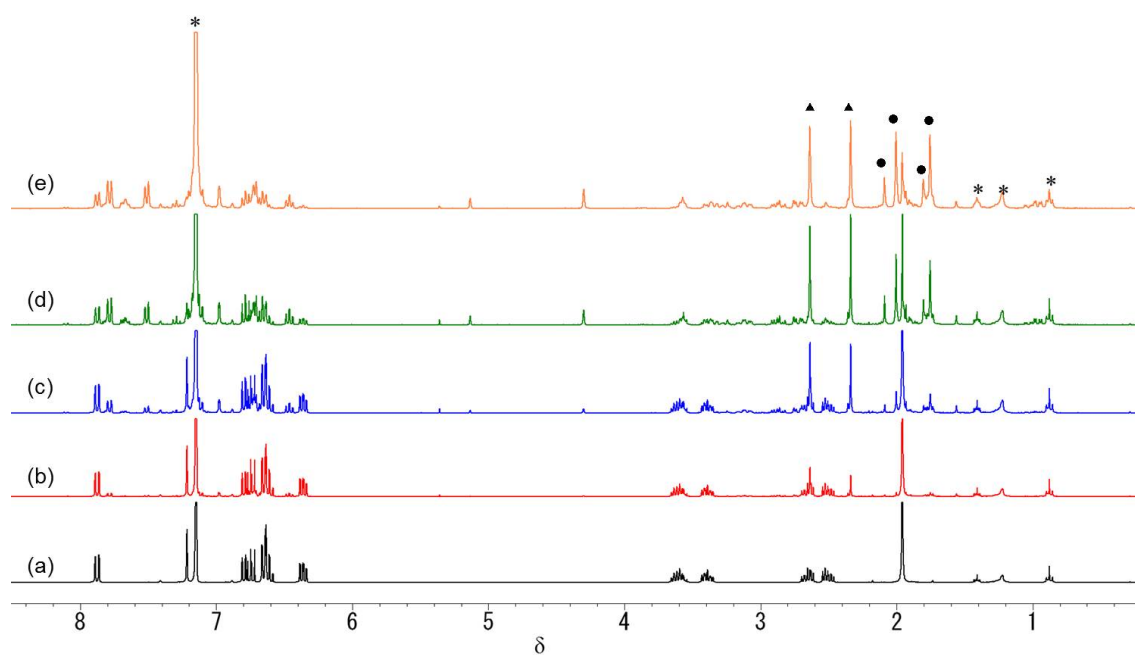

**Figure S9.**  $^1\text{H}$  NMR spectra (300 MHz) of **2** in  $\text{C}_6\text{D}_6$ : (a) A solution of **2**. The solution was irradiated with a high pressure Hg lamp for (b) 1 h, (c) 2 h, (d) 5 h, and then (e) 3 h. Solid triangles denote  $\text{NMe}_2$  of  $[\{\text{Fe}(\mu\text{-BPT-NN-}\kappa^4\text{S,C,N,N}')(\text{CO})\}\text{Fe}(\text{CO})_3]$ . Solid circles denote  $\text{NMe}_2$  of **1a**, **1b**.

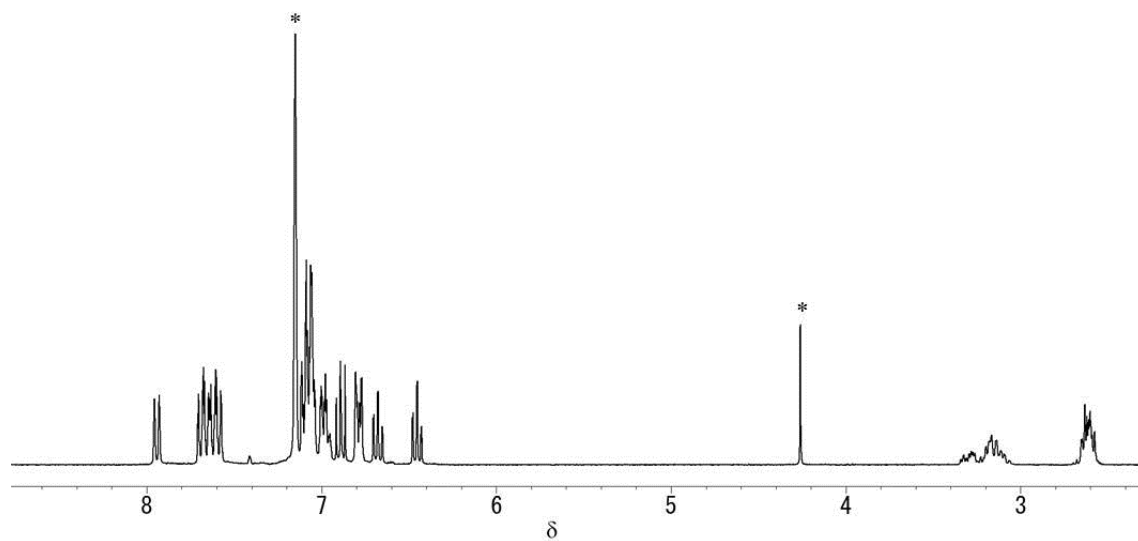

**Figure S10.**  $^1\text{H}$  NMR spectrum (300 MHz) of **3** in  $\text{C}_6\text{D}_6$ .

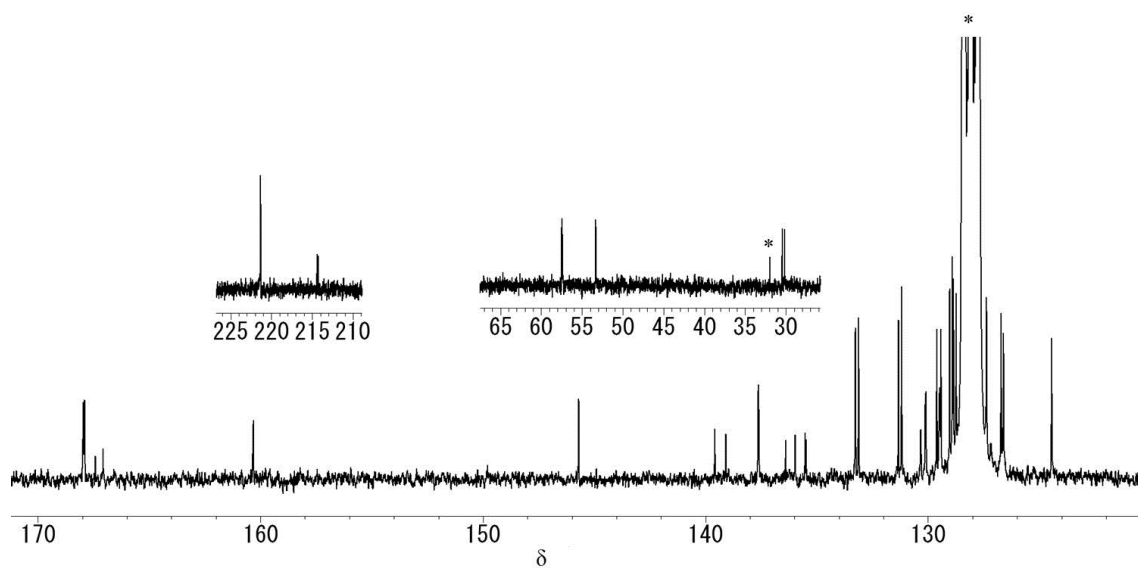

**Figure S11.**  $^{13}\text{C}\{^1\text{H}\}$  NMR spectrum (75.5 MHz) of **3** in  $\text{C}_6\text{D}_6$ . Residual solvent signals are marked with an asterisk.



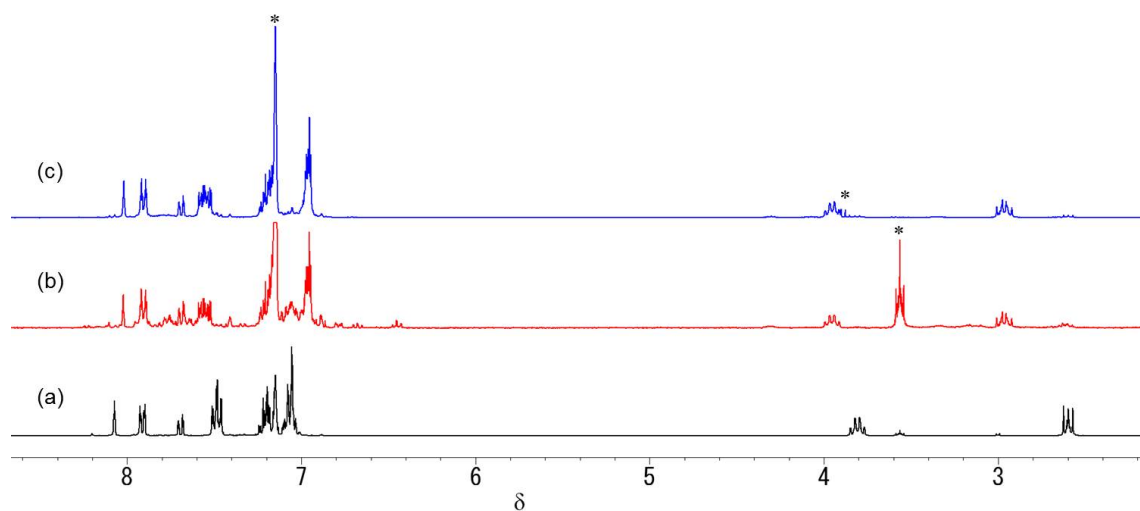

**Figure S12.**  $^1\text{H}$  NMR spectra (300 MHz,  $\text{C}_6\text{D}_6$ ). (a) DBT-NP. (b) A THF solution of DBT-NP and  $\text{Fe}(\text{CO})_5$  was irradiated with a high pressure Hg lamp for 30 min. (c) The reaction solution was purified by column chromatography to afford complex **4**.

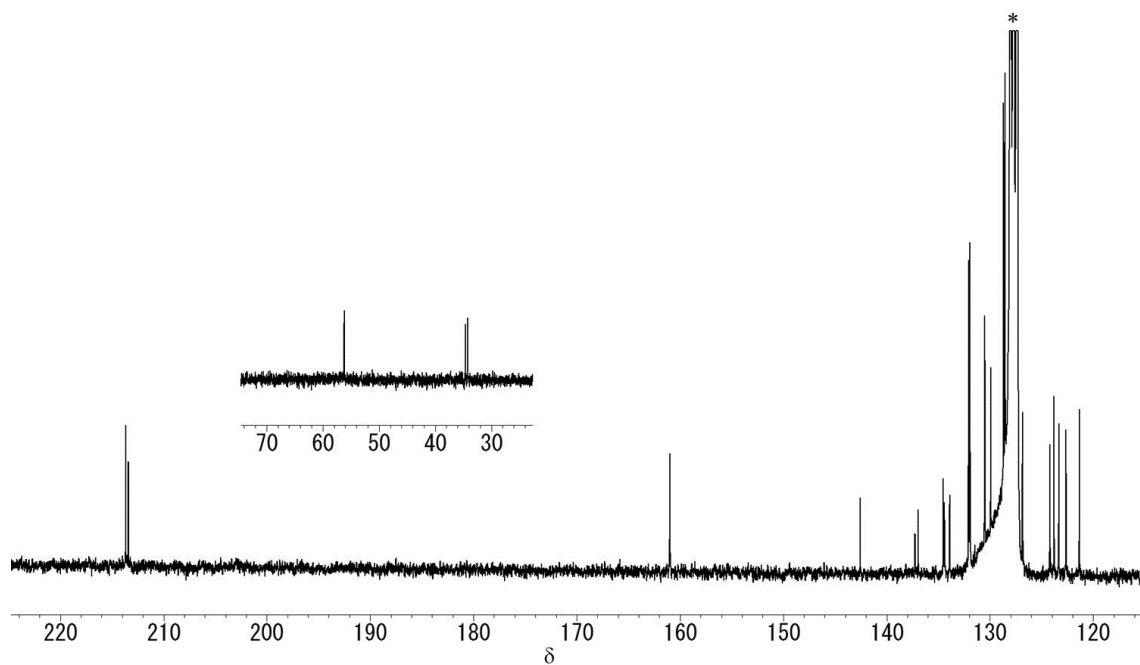

**Figure S13.**  $^{13}\text{C}\{^1\text{H}\}$  NMR spectrum (75.5 MHz) of **4** in  $\text{C}_6\text{D}_6$ .

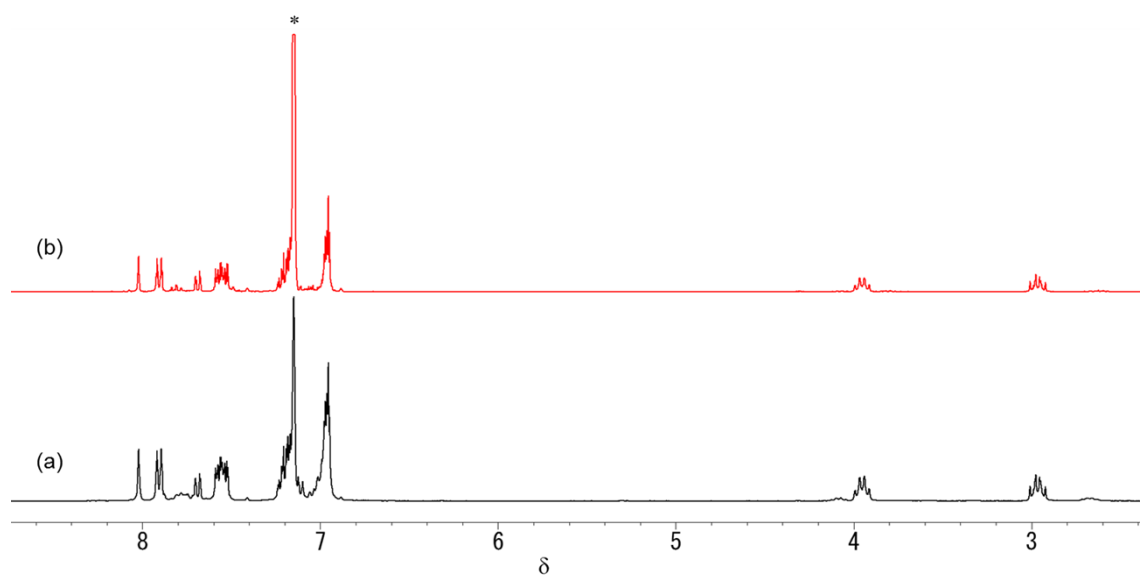

**Figure S14.** <sup>1</sup>H NMR spectra (300 MHz, C<sub>6</sub>D<sub>6</sub>): (a) A toluene solution of **3** was heated at 100 °C for 2 h under an atmosphere of CO. (b) Complex **4**.

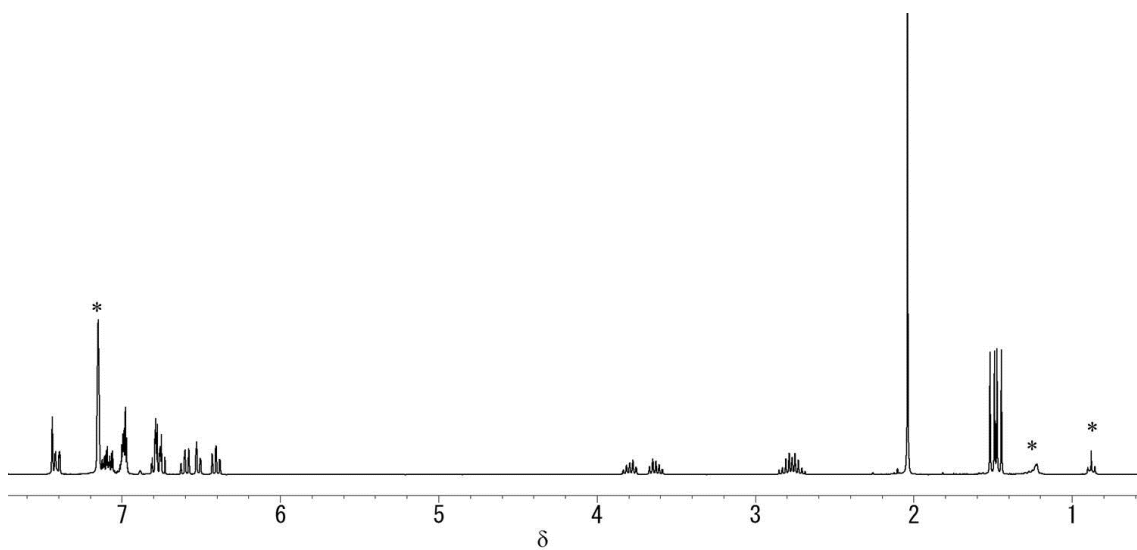

**Figure S15.**  $^1\text{H}$  NMR spectrum (300 MHz) of **5** in  $\text{C}_6\text{D}_6$ .

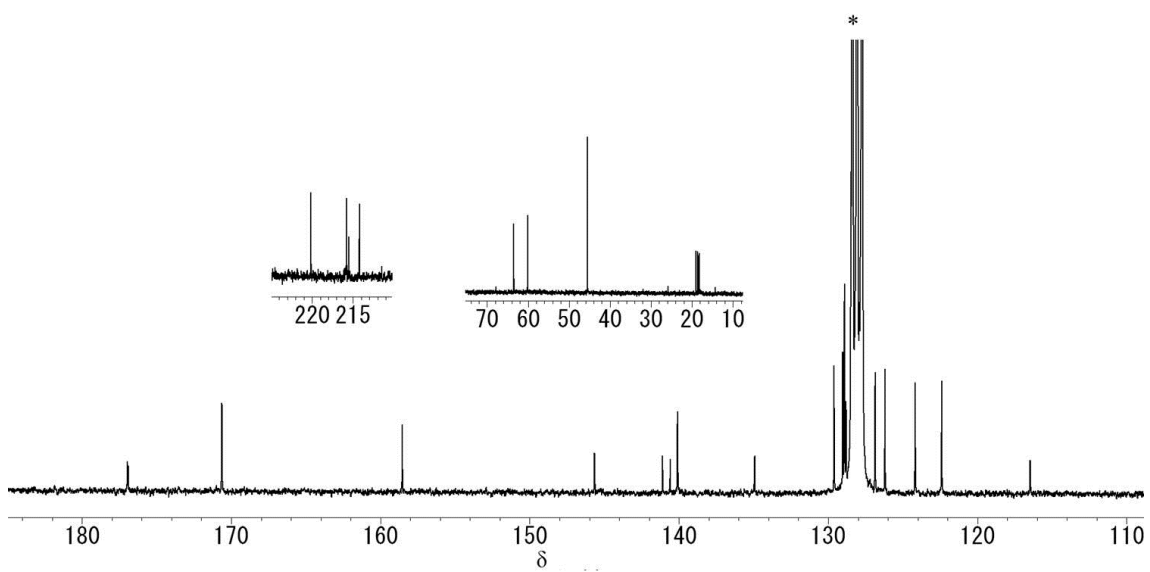

**Figure S16.**  $^{13}\text{C}\{^1\text{H}\}$  NMR spectrum (75.5 MHz) of **5** in  $\text{C}_6\text{D}_6$ .

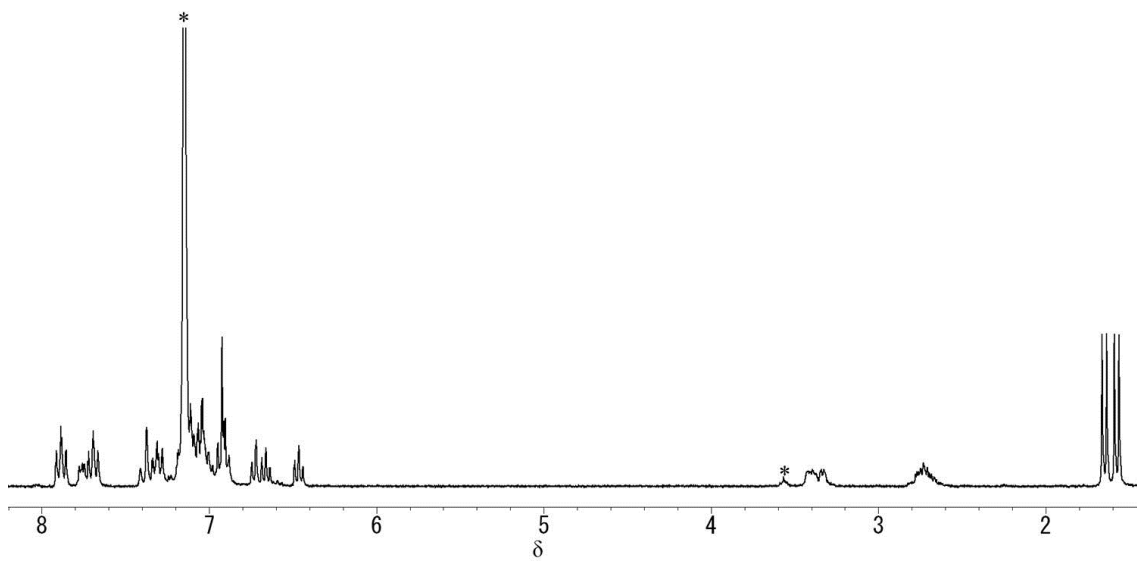

**Figure S17.**  $^1\text{H}$  NMR spectrum (300 MHz) of **6** in  $\text{C}_6\text{D}_6$ .

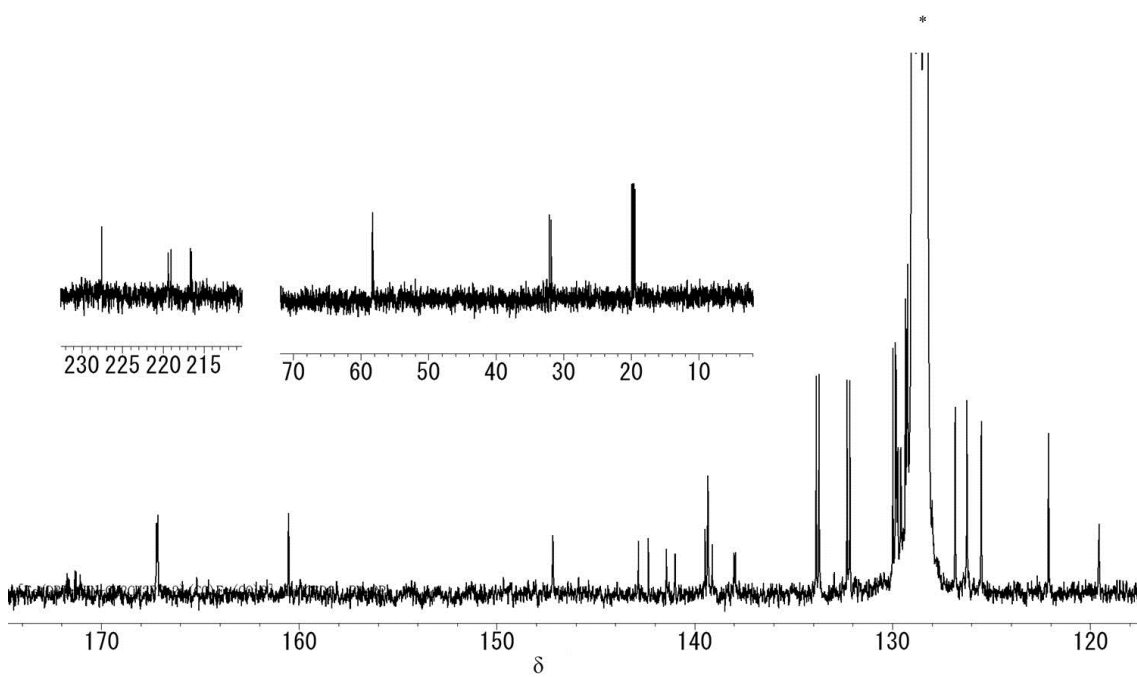

**Figure S18.**  $^{13}\text{C}\{^1\text{H}\}$  NMR spectrum (75.5 MHz) of **6** in  $\text{C}_6\text{D}_6$ .

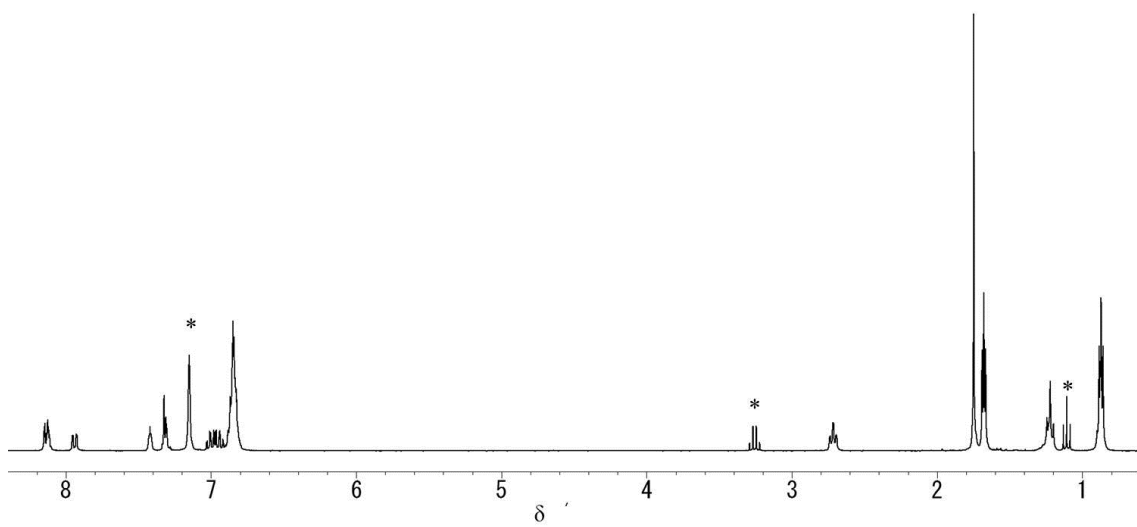

**Figure S19.**  $^1\text{H}$  NMR spectrum (300 MHz) of 7 in  $\text{C}_6\text{D}_6$ .

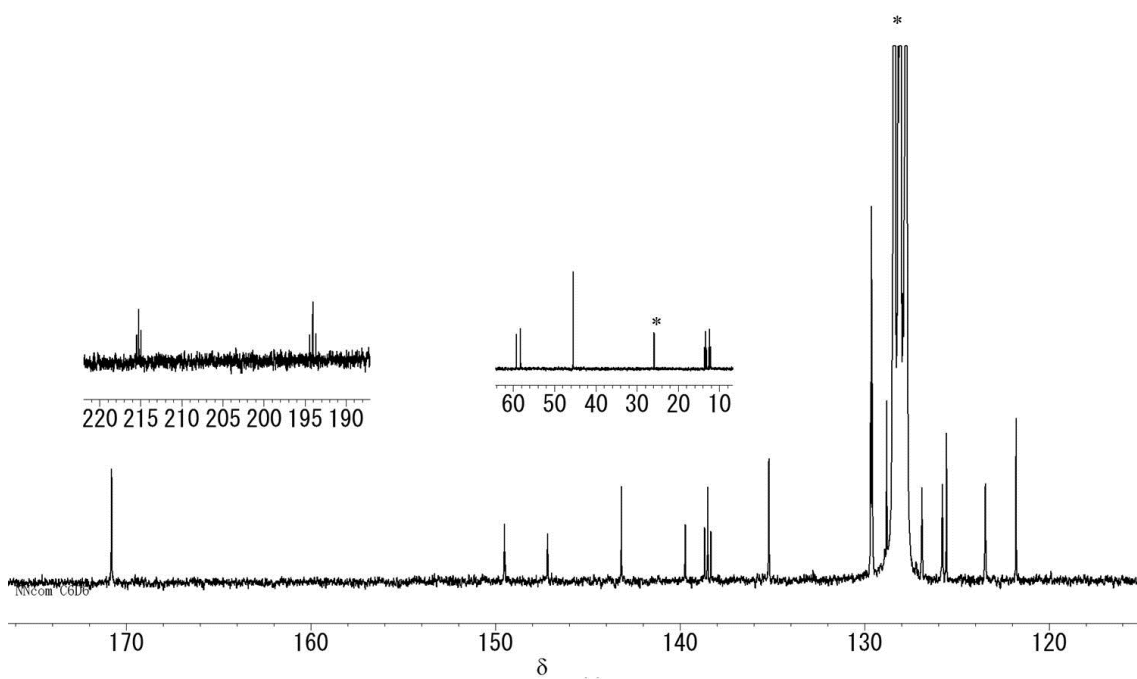

**Figure S20.**  $^{13}\text{C}\{^1\text{H}\}$  NMR spectrum (75.5 MHz) of 7 in  $\text{C}_6\text{D}_6$ .

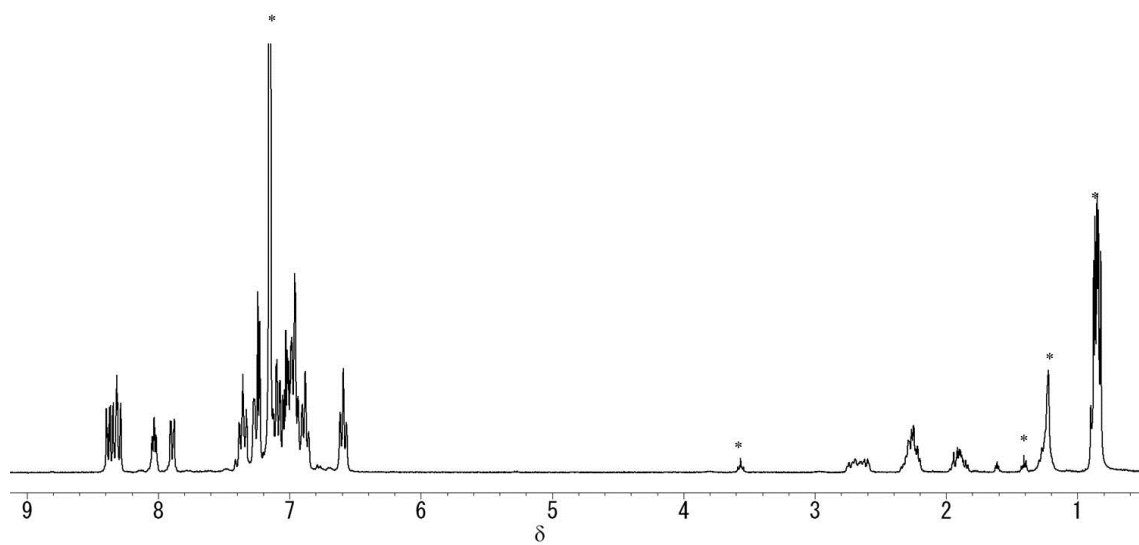

**Figure S21.**  $^1\text{H}$  NMR spectrum (300 MHz) of **8** in  $\text{C}_6\text{D}_6$ .

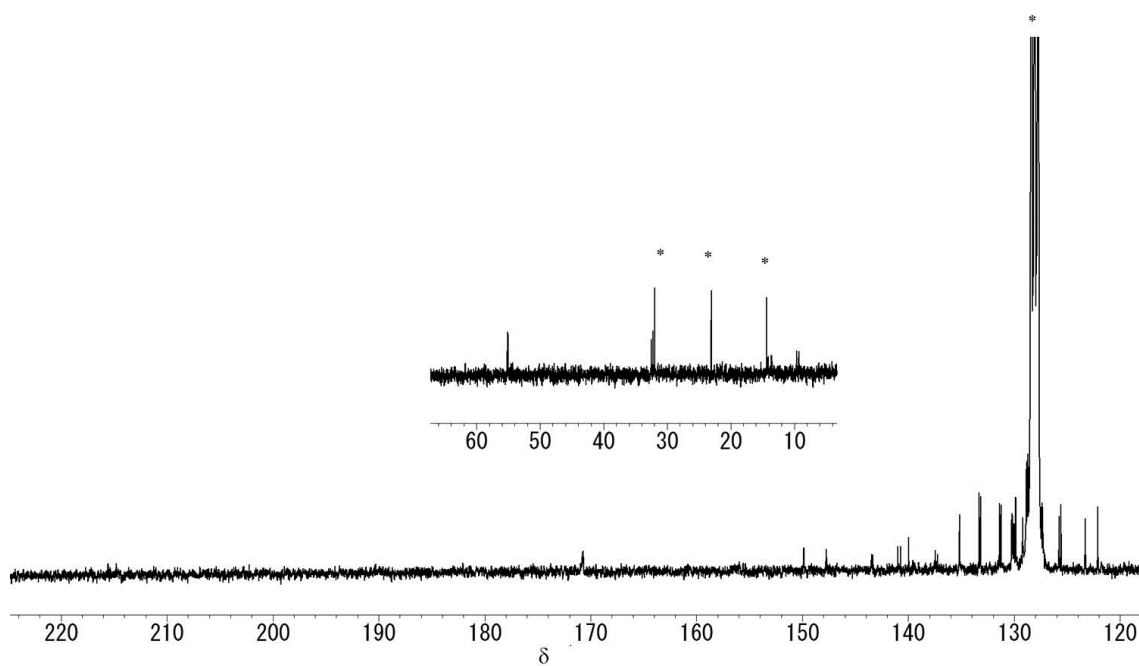

**Figure S22.**  $^{13}\text{C}\{^1\text{H}\}$  NMR spectrum (75.5 MHz) of **8** in  $\text{C}_6\text{D}_6$ .

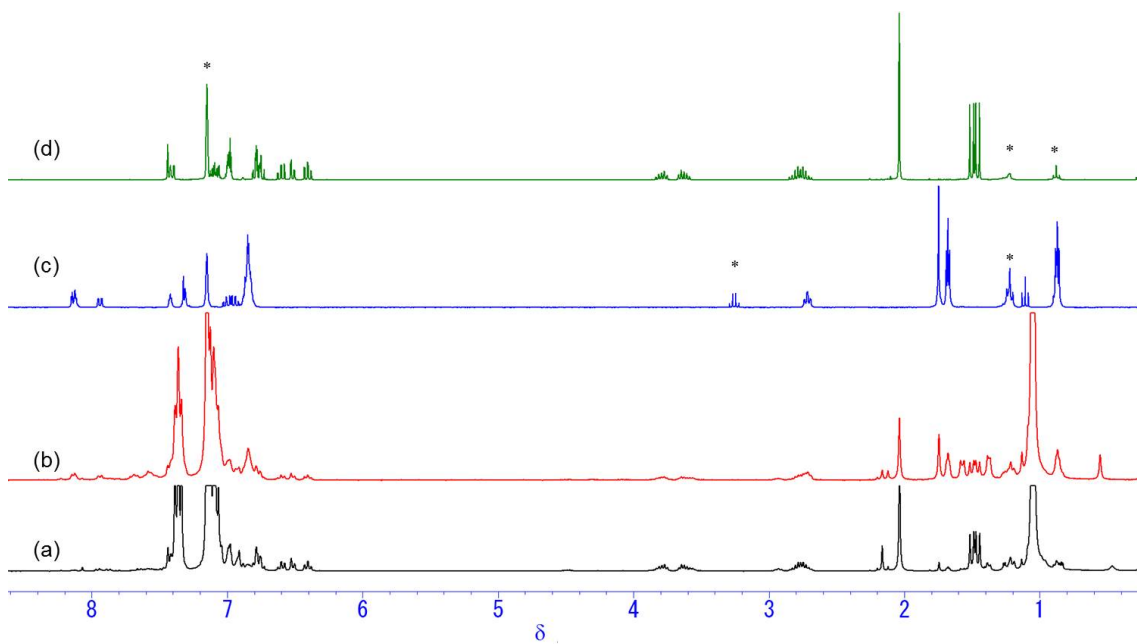

**Figure S23.** <sup>1</sup>H NMR spectra (300 MHz). (a) A C<sub>6</sub>D<sub>6</sub> solution of **5** and PMe<sub>2</sub>Ph. (b) After 20 hours at room temperature. (c) A C<sub>6</sub>D<sub>6</sub> solution of **7**. (d) A C<sub>6</sub>D<sub>6</sub> solution of **5**.

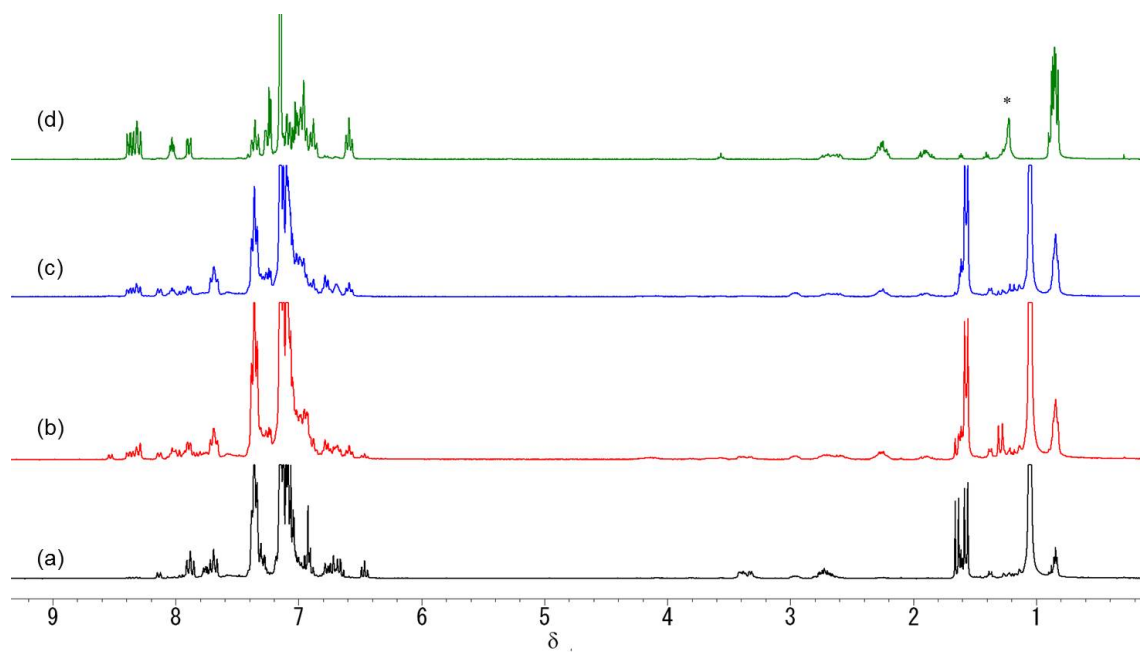

**Figure S24.**  $^1\text{H}$  NMR spectra (300 MHz). (a) A  $\text{C}_6\text{D}_6$  solution of **6** and  $\text{PMe}_2\text{Ph}$  were heated at  $60\text{ }^\circ\text{C}$  for 5 h. (b) CO gas was introduced. (c) The solution was heated at  $40\text{ }^\circ\text{C}$  for 1 h under an atmosphere of CO. (d) A  $\text{C}_6\text{D}_6$  solution of **8**.



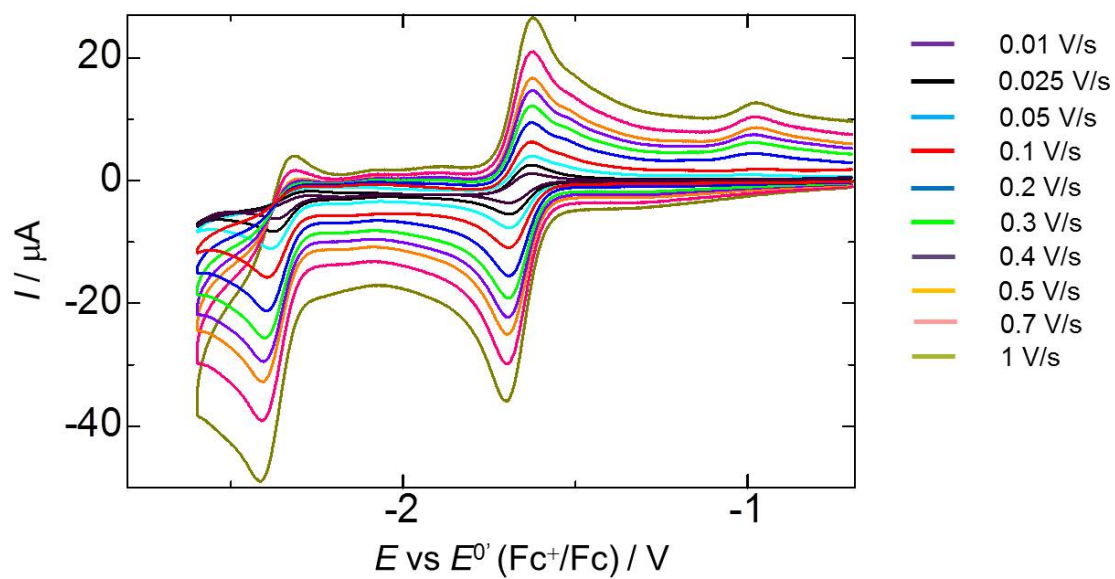

**Figure S25.** The reduction processes of **5** ( $5.0 \times 10^{-4}$  M) in CH<sub>3</sub>CN containing 0.10 M Bu<sub>4</sub>NPF<sub>6</sub> recorded at scan rates from 0.01 to 1 V s<sup>-1</sup>: working electrode, glassy carbon; auxiliary electrode, platinum wire; reference electrode, Ag/Ag<sup>+</sup>. Potentials are versus ferrocenium/ferrocene (Fc<sup>+</sup>/Fc).

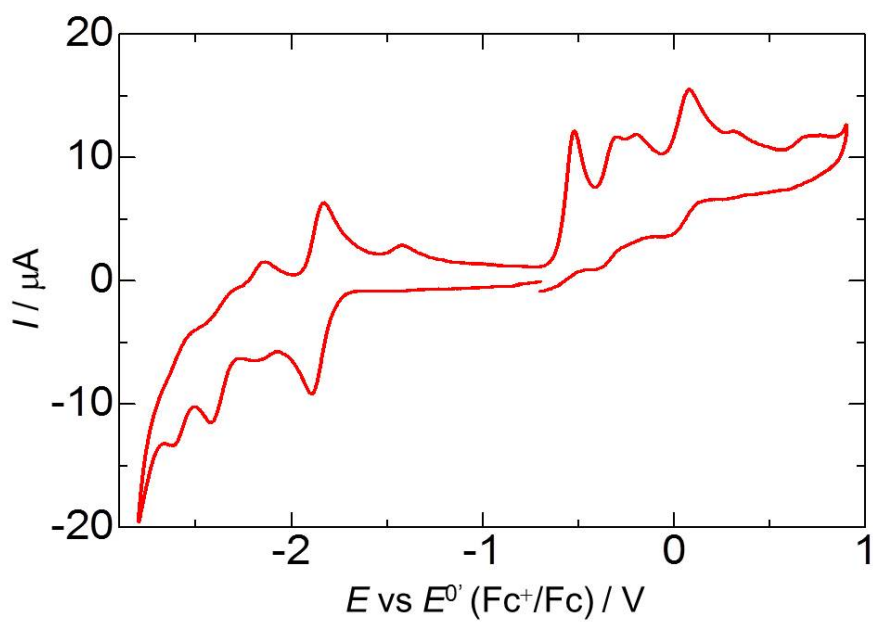

**Figure S26.** The reduction processes of **6** ( $5.0 \times 10^{-4}$  M) in  $\text{CH}_3\text{CN}$  containing 0.10 M  $\text{Bu}_4\text{NPF}_6$  recorded in the scan range of 0.9 to  $-2.8$  V: working electrode, glassy carbon; auxiliary electrode, platinum wire; reference electrode,  $\text{Ag}/\text{Ag}^+$ . Potentials are versus ferrocenium/ferrocene ( $\text{Fc}^+/\text{Fc}$ ).
